# Supplementary material for: The Effect of Hops (Humulus lupulus L.) Extract Supplementation on Weight Gain, Adiposity and Intestinal Function in Ovariectomized Mice
Source: PubMed Central journal article supplement (PMC6950254; doi:10.3390/nu11123004), 2019-12-07
Supplement: nutrients-11-03004-s001.pdf [file nutrients-11-03004-s001.pdf]

Supplementary Data

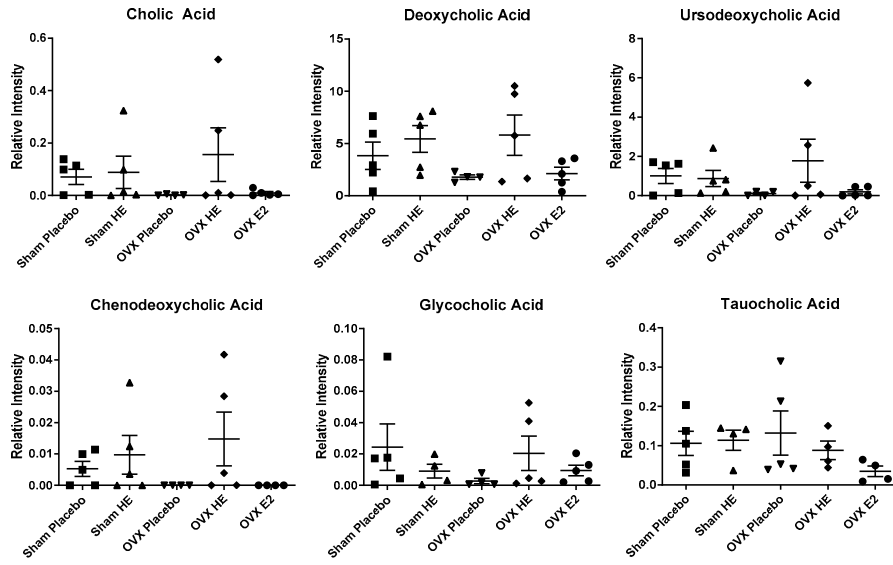

Figure S1. Levels of bile acids in fecal samples. .

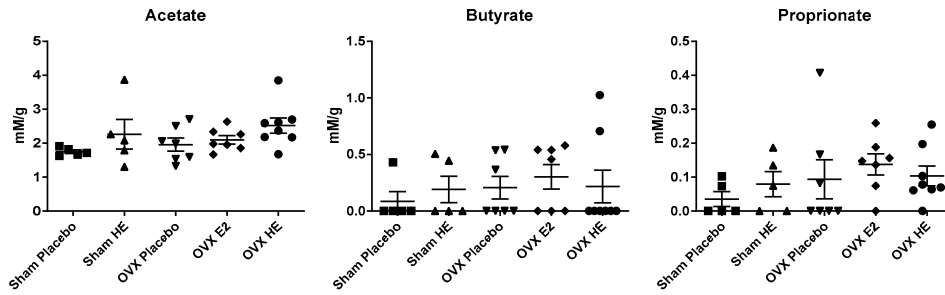

Figure S2. Levels of short chain fatty acids (SCFA) in fecal samples.

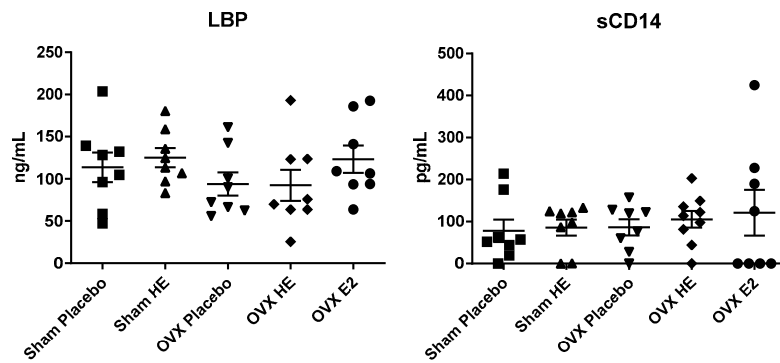

Figure S3. Blood measures of endotoxin binding proteins LBP and soluble CD14.

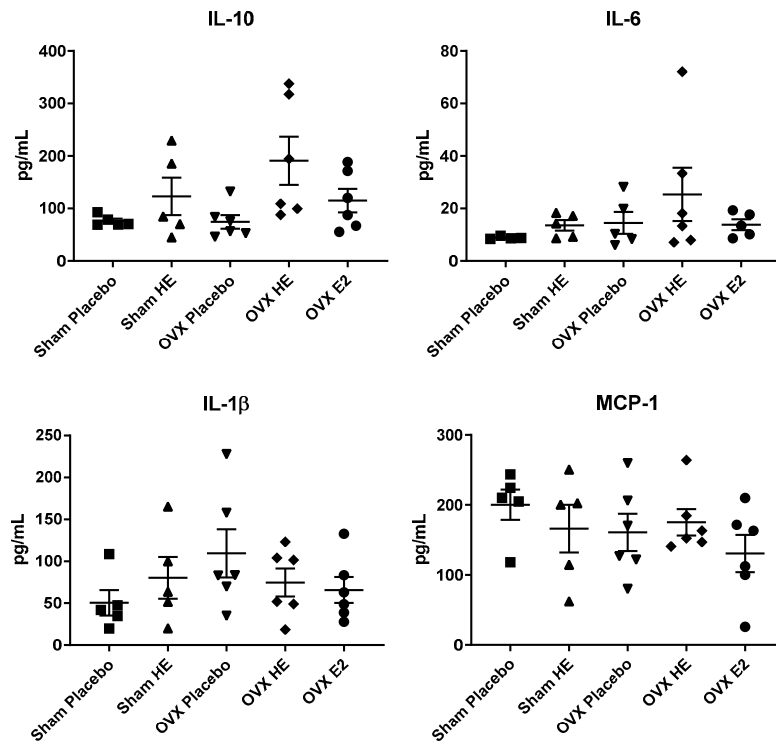

Figure S4. Cytokine and chemokine levels in proximal colon.
